# Supplementary material for: Performance of a Novel Real-Time PCR-Based Assay for Rapid Monkeypox Virus Detection in Human Samples
Source: MDPI journal article supplement (doi:10.3390/microorganisms11102513), 2023-10-08
Supplement: s1 [file s1]

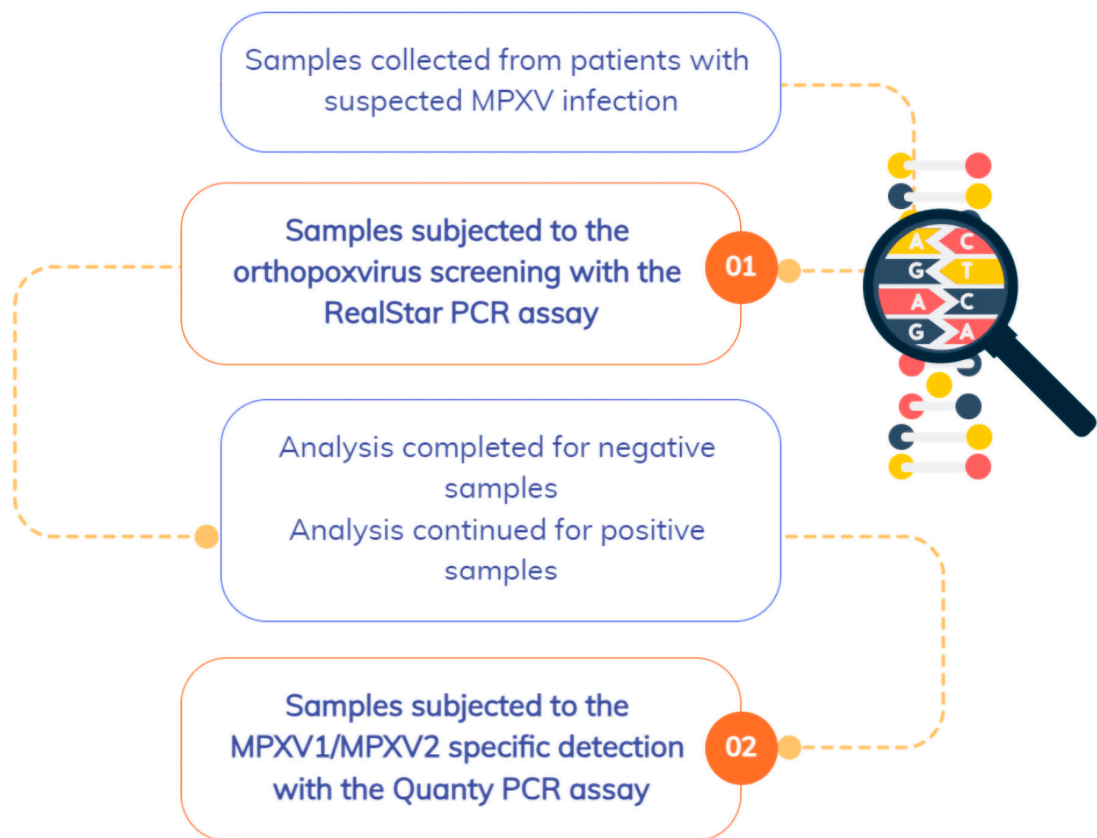

**Figure S1.** In-house real-time PCR based diagnostic algorithm for the detection of MPXV in clinical samples. Two steps of testing are performed, one to detect an orthopoxvirus in a sample and one to confirm a mpox virus clade I/clade II (MPXV1/MPXV2) in the positive sample from the first step. The diagnostic process, which takes a few hours to complete, has been validated using the MPXV DNA extracted from the skin lesions of an infected patient, which had been kindly provided by the Italian National Institute of Public Health.

**Table S1.** QIAstat-Dx assay results for samples collected at the time of diagnosis or follow-up for mpox (n = 108).

| Patient # | Samples at diagnosis |                |     | Samples at first follow-up<br>(Median [IQR]) time, 8 [7–12] days) |     |     | Samples at second follow-up<br>(Median [IQR]) time, 17 [12–20] days) |     |     |
|-----------|----------------------|----------------|-----|-------------------------------------------------------------------|-----|-----|----------------------------------------------------------------------|-----|-----|
|           | VS                   | OS             | WB  | VS                                                                | OS  | WB  | VS                                                                   | OS  | WB  |
| 1         | Pos                  | – <sup>1</sup> | Pos | Pos                                                               | Neg | Neg | –                                                                    | Neg | Neg |
| 2         | Pos                  | Neg            | –   | –                                                                 | –   | Neg | –                                                                    | –   | –   |
| 3         | Pos                  | Pos            | Pos | –                                                                 | Neg | Neg | –                                                                    | –   | –   |
| 4         | Pos                  | Neg            | Neg | –                                                                 | Neg | Neg | –                                                                    | –   | –   |
| 5         | Pos                  | Neg            | Neg | –                                                                 | Neg | Neg | –                                                                    | –   | –   |
| 6         | Pos                  | Pos            | Pos | Pos                                                               | Pos | Pos | –                                                                    | Neg | Neg |
| 7         | Pos                  | Pos            | Pos | –                                                                 | –   | –   | –                                                                    | –   | –   |
| 8         | Pos                  | Pos            | Pos | –                                                                 | Neg | Neg | –                                                                    | –   | –   |
| 9         | –                    | Pos            | Pos | –                                                                 | –   | –   | –                                                                    | –   | –   |
| 10        | Pos                  | Pos            | Neg | –                                                                 | Pos | Pos | Pos                                                                  | –   | Neg |
| 11        | Pos                  | Neg            | Neg | –                                                                 | Neg | Neg | –                                                                    | –   | –   |
| 12        | Pos                  | Pos            | Neg | –                                                                 | Pos | Neg | –                                                                    | –   | Neg |
| 13        | Pos                  | Neg            | Neg | Neg                                                               | –   | Pos | –                                                                    | –   | –   |
| 14        | Neg                  | Pos            | Neg | –                                                                 | –   | –   | –                                                                    | –   | –   |
| 15        | Pos                  | Pos            | Neg | –                                                                 | Neg | Neg | –                                                                    | –   | –   |
| 16        | Pos                  | Pos            | Neg | –                                                                 | Neg | Neg | –                                                                    | –   | –   |
| 17        | Pos                  | Pos            | Pos | Pos                                                               | Neg | Neg | Neg                                                                  | –   | –   |
| 18        | Pos                  | Pos            | Neg | Pos                                                               | Neg | Neg | Neg                                                                  | Neg | Neg |
| 19        | Pos                  | Pos            | Pos | –                                                                 | Pos | Neg | –                                                                    | Neg | Neg |
| 20        | Pos                  | Neg            | Neg | Neg                                                               | Neg | Neg | –                                                                    | –   | –   |

<sup>1</sup> The symbol indicates that no (positive or negative) result was available, as no sample was obtained from the patient.  
IQR, interquartile range; VS, vesicular swab; OS, oropharyngeal swab; WB, whole blood.

**Table S2.** Description of positive PCR results for 51 clinical samples included in the study.

| Results (expressed as Ct) by each of indicated assays |          |                    |           |                                       |                                     |
|-------------------------------------------------------|----------|--------------------|-----------|---------------------------------------|-------------------------------------|
| Patient #                                             | Sample # | Type of sample     | Reference | RealStar Orthopoxvirus<br>PCR kit 1.0 | QIAstat-Dx Viral<br>Vesicular panel |
| 1                                                     | 1        | Whole blood        | 31.0      | 30.2                                  | 31.2                                |
|                                                       | 2        | Vesicular swab     | 23.2      | 23.8                                  | 24.1                                |
|                                                       | 3        | Vesicular swab     | 24.0      | 23.1                                  | 24.2                                |
| 2                                                     | 4        | Vesicular swab     | 37.2      | 36.5                                  | 38.1                                |
| 3                                                     | 5        | Whole blood        | 35.4      | 34.6                                  | 36.1                                |
|                                                       | 6        | Oropharyngeal swab | 23.2      | 22.7                                  | 24.0                                |
|                                                       | 7        | Vesicular swab     | 18.2      | 18.0                                  | 18.0                                |
| 4                                                     | 8        | Vesicular swab     | 22.0      | 21.0                                  | 22.0                                |
| 5                                                     | 9        | Vesicular swab     | 18.4      | 19.0                                  | 19.0                                |
| 6                                                     | 10       | Whole blood        | 33.0      | 32.2                                  | 34.1                                |
|                                                       | 11       | Oropharyngeal swab | 23.9      | 24.8                                  | 25.0                                |
|                                                       | 12       | Vesicular swab     | 25.4      | 26.0                                  | 26.0                                |
|                                                       | 13       | Whole blood        | 38.1      | 38.0                                  | 38.3                                |
|                                                       | 14       | Oropharyngeal swab | 22.7      | 23.4                                  | 25.1                                |
|                                                       | 15       | Vesicular swab     | 17.9      | 18.0                                  | 19.3                                |
|                                                       | 16       | Whole blood        | 34.0      | 34.0                                  | 35.1                                |
| 7                                                     | 17       | Oropharyngeal swab | 25.8      | 22.9                                  | 26.0                                |
|                                                       | 18       | Vesicular swab     | 23.0      | 21.0                                  | 22.0                                |
|                                                       | 19       | Whole blood        | 35.2      | 33.0                                  | 35.4                                |
| 8                                                     | 20       | Oropharyngeal swab | 34.8      | 30.8                                  | 35.0                                |
|                                                       | 21       | Vesicular swab     | 24.4      | 23.0                                  | 35.0                                |
|                                                       | 22       | Whole blood        | 37.5      | 38.9                                  | 38.0                                |
| 9                                                     | 23       | Oropharyngeal swab | 30.1      | 29.2                                  | 30.0                                |
|                                                       | 24       | Oropharyngeal swab | 30.2      | 29.0                                  | 35.1                                |
|                                                       | 25       | Vesicular swab     | 20.6      | 19.0                                  | 21.0                                |
| 10                                                    | 26       | Whole blood        | 36.6      | 37.7                                  | 38.7                                |
|                                                       | 27       | Oropharyngeal swab | 27.3      | 26.0                                  | 29.8                                |
|                                                       | 28       | Vesicular swab     | 33.1      | 32.0                                  | 34.2                                |
| 11                                                    | 29       | Vesicular swab     | 22.9      | 22.0                                  | 24.0                                |
| 12                                                    | 30       | Oropharyngeal swab | 30.9      | 29.0                                  | 31.4                                |
|                                                       | 31       | Vesicular swab     | 32.7      | 33.0                                  | 33.8                                |
|                                                       | 32       | Oropharyngeal swab | 33.5      | 34.0                                  | 35.8                                |
| 13                                                    | 33       | Vesicular swab     | 25.8      | 24.0                                  | 26.6                                |
|                                                       | 34       | Whole blood        | 37.4      | 36.0                                  | 38.5                                |
| 14                                                    | 35       | Oropharyngeal swab | 23.0      | 22.0                                  | 23.1                                |
| 15                                                    | 36       | Oropharyngeal swab | 26.0      | 22.0                                  | 27.3                                |
|                                                       | 37       | Vesicular swab     | 22.1      | 20.0                                  | 22.4                                |
| 16                                                    | 38       | Oropharyngeal swab | 35.1      | 34.6                                  | 36.1                                |
|                                                       | 39       | Vesicular swab     | 20.7      | 21.0                                  | 21.0                                |
| 17                                                    | 40       | Vesicular swab     | 29.0      | 29.0                                  | 30.0                                |
|                                                       | 41       | Oropharyngeal swab | 24.3      | 21.0                                  | 23.0                                |
|                                                       | 42       | Whole blood        | 32.9      | 30.0                                  | 32.1                                |
|                                                       | 43       | Vesicular swab     | 34.7      | 32.0                                  | 35.3                                |
| 18                                                    | 44       | Vesicular swab     | 28.0      | 27.0                                  | 30.4                                |
|                                                       | 45       | Oropharyngeal swab | 22.3      | 22.0                                  | 24.1                                |
|                                                       | 46       | Vesicular swab     | 36.8      | 37.0                                  | 38.6                                |
| 19                                                    | 47       | Vesicular swab     | 22.0      | 23.0                                  | 23.5                                |
|                                                       | 48       | Oropharyngeal swab | 23.5      | 21.0                                  | 24.7                                |
|                                                       | 49       | Whole blood        | 30.1      | 32.4                                  | 33.1                                |
| 20                                                    | 50       | Oropharyngeal swab | 38.7      | 38.0                                  | 39.0                                |
|                                                       | 51       | Vesicular swab     | 30.0      | 29.1                                  | 31.8                                |

Ct, cycle threshold.
